# Supplementary material for: ACE2-containing defensosomes serve as decoys to inhibit SARS-CoV-2 infection
Source: PubMed Central journal article supplement (PMC9469972; doi:10.1371/journal.pbio.3001754), 2022-09-13
Supplement: pbio.3001754.s015.pdf [file pbio.3001754.s015.pdf]

**S1 Table.** Demographics and clinical characteristics of the COVID-19 patient cohort. Summary of hospitalized COVID-19 patients from which the ACE2+ exosomes were measured from the BALF. Data expressed as n(%) or Median[IQR]. BMI, body mass index. BMI is the weight in kilograms divided by the square of the height in meters. CHF: congestive heart failure; CAD: coronary artery disease; CKD: chronic kidney disease; CVA: cerebrovascular accident. HLD: hyperlipidemia; HTN: Hypertension; ECMO: extracorporeal membrane oxygenation. Respiratory culture: defined as having any respiratory culture performed. Positive bacteria: a culture resulting in any bacterial growth. Blood culture: defined as having any blood culture performed. ICU: intensive care unit; Ventilator days: total number of days on mechanical ventilation.

| <b>Variables</b>          | <b>Cohort</b> |
|---------------------------|---------------|
| <b>N</b>                  | 80            |
| <b>Age</b>                | 64 [51-71]    |
| <b>Age Category</b>       |               |
| <51                       | 19 (23.8%)    |
| 51-60                     | 11 (13.8%)    |
| 61-70                     | 27 (33.8%)    |
| >70                       | 23 (28.7%)    |
| <b>Sex (Male)</b>         | 62 (77.5%)    |
| <b>Race</b>               |               |
| White                     | 37 (46.2%)    |
| Asian                     | 3 (3.8%)      |
| Black or African American | 8 (10%)       |
| Other                     | 32 (40%)      |
| <b>Ethnicity</b>          |               |
| Hispanic or Latino        | 21 (26.2%)    |
| <b>BMI</b>                | 26.5 [24-30]  |
| BMI $\geq$ 30             | 24 (30%)      |
| <b>Comorbidities</b>      |               |
| Asthma                    | 1 (1.2%)      |
| CAD                       | 12 (15%)      |
| CHF                       | 6 (7.5%)      |
| CKD                       | 11 (13.8%)    |
| CVA                       | 15 (18.8%)    |
| Diabetes                  | 31 (38.8%)    |
| HLD                       | 26 (32.5%)    |
| HTN                       | 41 (51.2%)    |
| <b>Smoking Status</b>     |               |
| Never                     | 53 (66.2%)    |
| Ex.Smoker                 | 12 (15%)      |

|                                     |            |
|-------------------------------------|------------|
| Current                             | 6 (7.5%)   |
| <b>Respiratory Culture</b>          |            |
| Any respiratory pathogenic bacteria | 66 (82.5%) |
| <i>Staphylococcus aureus</i>        | 15 (18.8%) |
| <i>C. albicans</i>                  | 17 (21.3%) |
| <b>Blood Culture</b>                |            |
| Any positive bacterial culture      | 46 (57.5%) |
| <b>Treatment and Outcomes</b>       |            |
| Intubated                           | 80 (100%)  |
| Dialysis                            | 20 (25%)   |
| Dialysis days                       | 20 [9-32]  |
| ECMO                                | 13 (16.2%) |
| ECMO days                           | 14 [8-71]  |
| Ventilator days                     | 33 [24-49] |
| ICU length of stay                  | 39 [30-62] |
| Hospital length of stay             | 53 [39-73] |
| <b>Mortality</b>                    | 19 (23.8%) |
