# Supplementary material for: ACE2-containing defensosomes serve as decoys to inhibit SARS-CoV-2 infection
Source: PubMed Central journal article supplement (PMC9469972; doi:10.1371/journal.pbio.3001754), 2022-09-13
Supplement: pbio.3001754.s016.pdf [file pbio.3001754.s016.pdf]

**S2 Table.** Regression using negative binomial model and length of stay in the ICU as the outcome. *p*, P-value, *CI*, confidence interval

| <b>Length of stay in ICU (Days)</b>   |                                     |                    |                  |
|---------------------------------------|-------------------------------------|--------------------|------------------|
| <b><i>Predictors</i></b>              | <b><i>Incidence Rate Ratios</i></b> | <b><i>CI</i></b>   | <b><i>p</i></b>  |
| Age (years)                           | 1.0072                              | 0.9907 – 1.0240    | 0.395            |
| % ACE2 positive (BAL exosomes)        | 0.9865                              | 0.9816 – 0.9915    | <b>&lt;0.001</b> |
| Sex [M]                               | 2.5665                              | 0.8587 – 7.6710    | 0.092            |
| Hypertension                          | 1.9773                              | 0.2710 – 14.4269   | 0.501            |
| BAL <i>C. albicans</i> [Positive]     | 1.5818                              | 1.1825 – 2.1159    | <b>0.002</b>     |
| Blood culture final result [Positive] | 1.1724                              | 0.9698 – 1.4173    | 0.1              |
| <b>(Intercept)</b>                    | 46.6348                             | 17.3749 – 125.1689 | <0.001           |
| <b>Observations</b>                   | 78                                  |                    |                  |
| <b>R2 Nagelkerke</b>                  | 0.581                               |                    |                  |
