# Supplementary material for: ACE2-containing defensosomes serve as decoys to inhibit SARS-CoV-2 infection
Source: PubMed Central journal article supplement (PMC9469972; doi:10.1371/journal.pbio.3001754), 2022-09-13
Supplement: pbio.3001754.s017.pdf [file pbio.3001754.s017.pdf]

**S3 Table.** Linear regression on covariates including ACE2 MFI using length of stay in the ICU as the outcome. *p*, P-value, *CI*, confidence interval

| <b>Length of Stay in ICU (Days)</b>           |                  |                     |              |
|-----------------------------------------------|------------------|---------------------|--------------|
| <b>Predictors</b>                             | <i>Estimates</i> | <i>CI</i>           | <i>p</i>     |
| Age (years)                                   | 0.4685           | -0.3995 – 1.3365    | 0.285        |
| ACE2 MFI                                      | -0.0291          | -0.0481 – -0.0100   | <b>0.003</b> |
| sex [M]                                       | 53.6830          | -3.6455 – 111.0116  | 0.066        |
| Hypertension                                  | 22.1203          | -80.3790 – 124.6196 | 0.668        |
| BAL <i>C. albicans</i> [Positive]             | 21.1636          | 5.5735 – 36.7537    | <b>0.009</b> |
| Blood culture final result [Positive]         | 4.5791           | -5.4529 – 14.6112   | 0.366        |
| <b>(Intercept)</b>                            | 36.1704          | -14.3409 – 86.6817  | 0.158        |
| <b>Observations</b>                           | 78               |                     |              |
| <b>R<sup>2</sup> / R<sup>2</sup> adjusted</b> | 0.273 / 0.165    |                     |              |
