# Supplementary material for: ACE2-containing defensosomes serve as decoys to inhibit SARS-CoV-2 infection
Source: PubMed Central journal article supplement (PMC9469972; doi:10.1371/journal.pbio.3001754), 2022-09-13
Supplement: pbio.3001754.s018.pdf [file pbio.3001754.s018.pdf]

**S4 Table.** Linear regression on covariates including ACE2 MFI using ventilation days as an outcome.  $p$ , P-value,  $CI$ , confidence interval

| <b>Ventilation Days</b>                       |                  |                 |              |
|-----------------------------------------------|------------------|-----------------|--------------|
| <i>Predictors</i>                             | <i>Estimates</i> | <i>CI</i>       | <i>p</i>     |
| Age (Years)                                   | 0.55             | -0.42 – 1.51    | 0.265        |
| ACE2 MFI                                      | -0.01            | -0.03 – 0.00    | 0.132        |
| Sex [M]                                       | 70.09            | 6.37 – 133.82   | <b>0.032</b> |
| Hypertension                                  | -41.15           | -154.43 – 72.13 | 0.471        |
| BAL <i>C. albicans</i> [Positive]             | 25.70            | 9.15 – 42.25    | <b>0.003</b> |
| Blood culture final result [Positive]         | -2.35            | -13.48 – 8.79   | 0.676        |
| <b>(Intercept)</b>                            | 16.34            | -39.90 – 72.58  | 0.564        |
| <b>Observations</b>                           | 80               |                 |              |
| <b>R<sup>2</sup> / R<sup>2</sup> adjusted</b> | 0.290 / 0.187    |                 |              |
