# Supplementary material for: ACE2-containing defensosomes serve as decoys to inhibit SARS-CoV-2 infection
Source: PubMed Central journal article supplement (PMC9469972; doi:10.1371/journal.pbio.3001754), 2022-09-13
Supplement: pbio.3001754.s019.pdf [file pbio.3001754.s019.pdf]

**S5 Table.** Regression using negative binomial model and ventilation days as the outcome. *p*, P-value, *CI*, confidence interval

| <b>Ventilation Days</b>               |                              |                  |                  |
|---------------------------------------|------------------------------|------------------|------------------|
| <i>Predictors</i>                     | <i>Incidence Rate Ratios</i> | <i>CI</i>        | <i>p</i>         |
| Age (Years)                           | 1.0153                       | 0.9947 – 1.0363  | 0.146            |
| % ACE2 positive (BAL exosomes)        | 0.9923                       | 0.9869 – 0.9979  | <b>0.007</b>     |
| Sex [M]                               | 5.3818                       | 1.4056 – 20.6056 | <b>0.014</b>     |
| Hypertension                          | 0.4474                       | 0.0416 – 4.8157  | 0.507            |
| BAL <i>C. albicans</i> [Positive]     | 1.6952                       | 1.2044 – 2.3859  | <b>0.002</b>     |
| Blood culture final result [Positive] | 1.0380                       | 0.8232 – 1.3089  | 0.752            |
| <b>(Intercept)</b>                    | 20.4347                      | 6.0498 – 69.0235 | <b>&lt;0.001</b> |
| <b>Observations</b>                   | 80                           |                  |                  |
| <b>R<sup>2</sup> Nagelkerke</b>       | 0.483                        |                  |                  |
